# Supplementary material
Source: PubMed Central journal article supplement (PMC2804159)
Supplement: supp_M109.030130_Supplementary_Method.pdf [file supp_M109.030130_Supplementary_Method.pdf]

### **Succinate dehydrogenase assay**

Succinate dehydrogenase activity was assessed by 3-(4,5-dimethylthiazol-2-yl)-2,5-diphenyltetrazolium bromide (MTT) reduction. Cells ( $1 \times 10^4$  cells/well) were plated in 96-well plates. Twenty-four hours later, cells were incubated in PQQ for 24 or 48 h, then incubated in phenol-red free DMEM containing MTT (1 mg MTT/mL medium, Sigma-Aldrich) for 2 h. Cell medium was removed, and MTT-formazan was solubilized with DMSO and read using a spectrophotometric microplate reader. Succinate dehydrogenase activity was normalized to cell number and expressed relative to respective controls at 24 or 48 h.
