# Supplementary material
Source: PubMed Central journal article supplement (PMC2804159)
Supplement: supp_M109.030130_SuppTables.pdf [file supp_M109.030130_SuppTables.pdf]

| Gene  | Oligonucleotide sequence                                                     |
|-------|------------------------------------------------------------------------------|
| NRF-2 | Sense: 5'-CGCGGACCGGAAGTCCGGCGGACCGGAAGTCCGGCGGACCGGAAGTCCGG-3'              |
|       | Antisense: 5'-CTAGCCGGACTTCCGGTCCGCCGGACTTCCGGTCCGCCGGACTTCCGGTCCGCCGGTAC-3' |
| CREB  | Sense: 5'-CTGACGTCAGAGTGACGTCAGAGTGACGTCAGAGTGACGTCAG-3'                     |
|       | Antisense: 5'-CTAGCTGACGTCACTCTGACGTCACTCTGACGTCACTCTGACGTCAGGTAC-3'         |

| Gene           | Forward                       | Reverse                         |
|----------------|-------------------------------|---------------------------------|
| Tfam           | 5'-GCACCCTGCAGAGTGTTCAA-3'    | 5'-CGCCCAGGCCTCTACCTT-3'        |
| TFB1M          | 5'-TGCGTTTCAGTTTCGAAGGA-3'    | 5'-TCGAGGCGTTGTGCTTCAG-3'       |
| TFB2M          | 5'-TTTCCACTTGGTAAAGCATTGCT-3' | 5'-GATCAACCGTACTCAGTGAACGTAA-3' |
| PGC-1 $\alpha$ | 5'-AACCACACCCACAGGATCAGA-3'   | 5'-TCTTCGCTTTATTGCTCCATGA-3'    |
| $\beta$ -actin | 5'-CGTGAAAAGATGACCCAGATCA-3'  | 5'-CAGCCTGGATGGCTACGTACA-3'     |
